# Supplementary material for: Distinct effects of inflammation on preconditioning and regeneration of the adult zebrafish heart
Source: Open Biol. 2016 Jul 20;6(7):160102. doi: 10.1098/rsob.160102 (PMC4967830; doi:10.1098/rsob.160102)
Supplement: Figure S2: PLX3397 binding pocket is conserved between human and zebrafish. [file rsob160102supp2.pdf]

a

|            |                                                                                   |
|------------|-----------------------------------------------------------------------------------|
| Human_KIT  | LFTPLLIGFVIVAGMMCIIVMILTYKYLQKPMYEVQWKVVEEINGNNYVYIDPTQLPYDH                      |
| Danio_KITA | LFTPLLIGFVAAAVILVLLIVLTYKYMOKPKYQIQWKVIEGIHGNNYVYIDPTQLPYDH                       |
| Danio_KITB | LFTPLLSGVVSTSVLLSFILVLLTYKYMOKPKYIEHWKVIDSFDGNNYTYIDPTQLPYDP                      |
|            | ***** : * . : : : * : : * : * : * : * : * : * : * : * : * : * : * : * : * : * : * |
|            | Transmembrane region Juxtamembrane domain                                         |
| Human_KIT  | KWEFFPRNRLSFGKTLGAGAFGKVVEATAYGLIKSDAAMTVAVKMLKPSAHLTEREALMSE                     |
| Danio_KITA | QWEFFPRDKLRFGKTLGSGAFGKVVEATAYGMSKADTVMTVAVKMLKPSAHATEKEALMSE                     |
| Danio_KITB | KWEFFPRERLRFGKILGSGAFGKVVAATAYGLCSADTVTITVAVKMLKPSAHSTEKEALMSE                    |
|            | ***** : * * * * * : * : * : * : * : * : * : * : * : * : * : * : * : * : * : *     |
|            | P-loop                                                                            |
| Human_KIT  | LKVLSYLGNHMINIVNLLGACTIGGPTLVI TEYCCYGDLLNFLRRKRDSFICSKQEDHAEA                    |
| Danio_KITA | LKVLSYLGNHINIVNLLGACTVGGPTLVI TEYCCFGDLLNFLRRRRVYFYTTLG---ED                      |
| Danio_KITB | LKVLSYIGNHINIVNLLGACTVGGPTLVI TEYCCYGDLLNFLRRKRDAFFSSKTG---D                      |
|            | ***** : * : * : * : * : * : * : * : * : * : * : * : * : * : * : *                 |
| Human_KIT  | ALYKNLLHSKESSCSDSTNEYMDMKPGVSIVVPTKADKRRSVRIG-SYIERDVTPTAIMED                     |
| Danio_KITA | AYYRNVMQSEP--NDSRNGYMTMKPSVLGIL--SSENRRSLNKGDSYSDSDAVSEILQE                       |
| Danio_KITB | GYKNNLSQTQPSIEGTDNGYMPMR-----SYQKRSNQTEWCDD                                       |
|            | . * : : * : : . : : . : : * * : * : * : * : * : * : * : * : * : * : * : *         |
|            | Kinase insertion domain                                                           |
| Human_KIT  | -DELDLDLEDLLSFSYQVAKGMFLASKNCIHRDLAARNILLTHGRLITKICDFGLARDIK                      |
| Danio_KITA | -DGLTLDLEDLLSFSYQVAKGMDFLASKNCIHRDLAARNILLTQGRVAKICDFGLARDIT                      |
| Danio_KITB | KDDLSDLTLEDLLSFSYQVAKGMDFLTSKNCIHRDLAARNVLLTQGRVAKICDFGLARDIT                     |
|            | * * : * * * * * * * * * * * * * * * * * * * * * * * * * * * * * * * * * * *       |
|            | Catalytic loop Activation                                                         |
| Human_KIT  | NDSNYVVKGNARLPVKWMAPESEIFNCVYTFESDVWSYGI FLWELFSL                                 |
| Danio_KITA | TDSNYVVKGNARLPVKWMSPESEIFECVYTFESDVWSYGILLWEIFSL                                  |
| Danio_KITB | RDSNYVLRGNARLPVKWMSPESEIFACVYTFESDVWSYGILLWEIFSL                                  |
|            | ***** : * : * : * : * : * : * : * : * : * : * : * : * : * : * : *                 |
|            | loop                                                                              |

b

|           |                                                                             |
|-----------|-----------------------------------------------------------------------------|
| Human_FMS | LFTPVVACMSIMALLLLL LLLL YKYKQPKYQVRWKIIESEYEGNSYTFIDPTQLPYNE                |
| Danio_FMS | IFTSAMCGSTVAMVVLGLLLIFMIYKYKQPKRYEIRWKIIEATNGNNYTFIDPTQLPYNE                |
|           | : * . : : * : * * : : * : * : * : * : * : * : * : * : * : * : * : * : * : * |
|           | Transmembrane region Juxtamembrane domain                                   |
| Human_FMS | KWEFFPRNNLQFGKTLGAGAFGKVVEATAFGLGKEDAVLKVAVKMLKSTAHADEKEALMSE               |
| Danio_FMS | KWEFFPRDKLKLGKTLGAGAFGKVVEATAFGLGKEDNITRVAVKMLKASAHPPDEREALMSE              |
|           | ***** : * : * : * : * : * : * : * : * : * : * : * : * : * : * : *           |
|           | P-loop                                                                      |
| Human_FMS | LKIMSHLGHQHENIVNLLGACTHGGPVLVI TEYCCYGDLLNFLRRKAEAMLGPSLSPGQDF              |
| Danio_FMS | LKILSHLGHQHKNIIVNLLGACTHGGPVLVI TEYCCYGDLLNFLRSKAENFNFVMTIPNFP              |
|           | ***** : * : * : * : * : * : * : * : * : * : * : * : * : * : * : *           |
| Human_FMS | EGGV DYKNIHLEKKYVRRDSGFSSQGVDTYVEMRPV-STSSNDSFSEQDLDEKGRPLEL                |
| Danio_FMS | EPMTDYKNVSTERMFVRSDSGSSSCSDHYLDMRPVTSRPTNSALDSSSECCQEDSWFLDM                |
|           | * . * : * : * : * : * : * : * : * : * : * : * : * : * : * : * : *           |
|           | Kinase insertion domain                                                     |
| Human_FMS | RDLH FSSQVAQGMFLASKNCIHRDVAARNVLLTN GHVAKICDFGLARDIMNDSNYIVK                |
| Danio_FMS | DDLRFSSQVAQGLD FLAASKNCIHRDVAARNVLLTNSRVAKICDFGLARDIMNDSNYVVK               |
|           | * : * : * : * : * : * : * : * : * : * : * : * : * : * : * : *               |
|           | Catalytic loop Activation loop                                              |
| Human_FMS | GNARLPVKWMAPESEIFDCVYTVQSDVWSYGILLWEIFSLGLNPYPGILVNSKFYKLVK                 |
| Danio_FMS | GNARLPVKWMAPESEIFECVYTVQSDVWSYGIMLWEIFSLGKSPYPNIVLDSKFYKMIK                 |
|           | ***** : * : * : * : * : * : * : * : * : * : * : * : * : * : * : *           |

**Figure S2: PLX3397 binding pocket is conserved between human and zebrafish.**

Alignment of the protein sequences of Homo sapiens KIT with Danio rerio KITA and KITB (a), and of Homo sapiens FMS with Danio rerio FMS (b) with T-Coffee. Important regions are labeled below the sequences. The residues making direct contact with the FMS/KIT inhibitor are indicated in red. "\*" - asterisk denotes the residue at which the position is exactly the same. ":" - colon indicates residues at which positions are very similar, and "." - dot, residues that are more or less similar.
