# Supplementary material for: Distinct effects of inflammation on preconditioning and regeneration of the adult zebrafish heart
Source: PubMed Central journal article supplement (PMC4967830; doi:10.1098/rsob.160102), 2016-07-20
Supplement: rsob160102supp1.pdf [file rsob160102supp1.pdf]

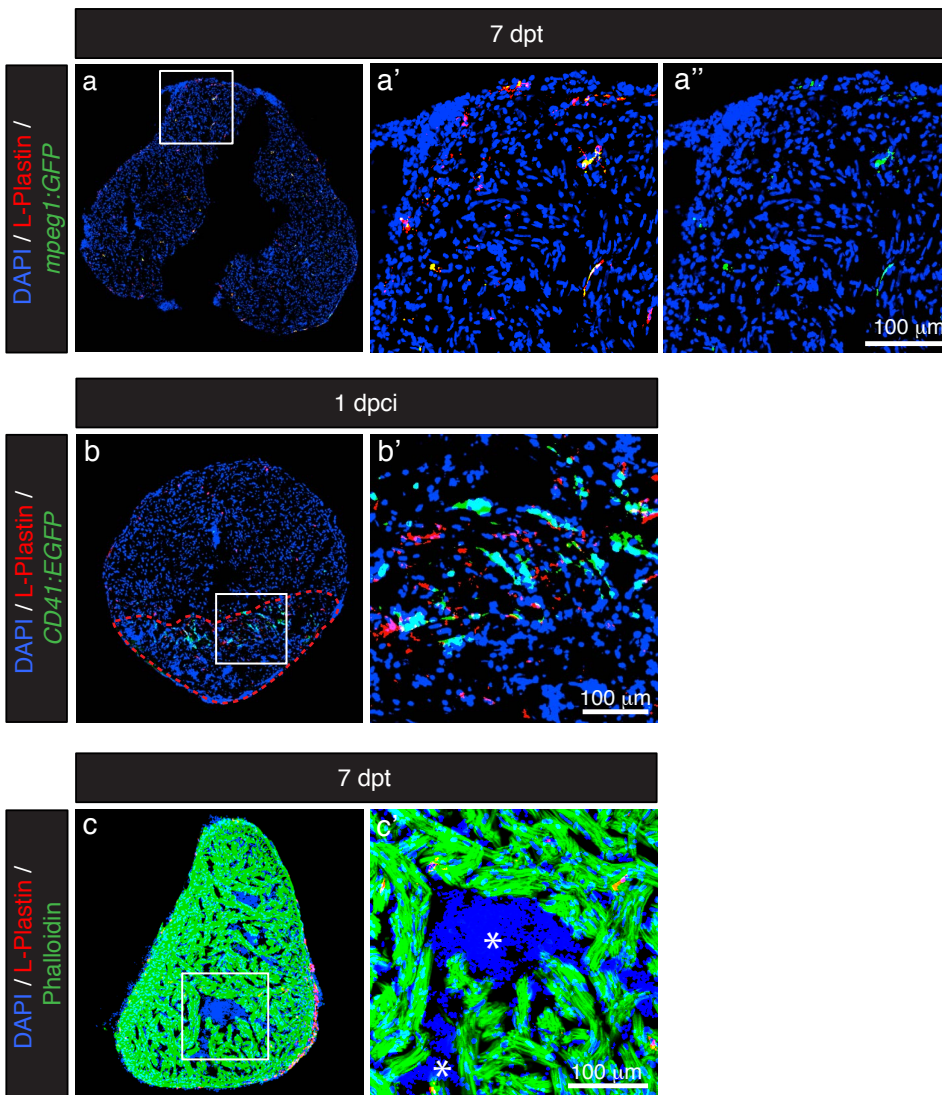

**Figure S1: L-Plastin staining colocalizes with the macrophage marker *mpeg1***

(a) Representative section of the heart of *mpeg1:GFP* fish (green, macrophage reporter line) at 7 dpt labeled with antibodies against L-Plastin (red, leukocyte protein) display an overlap of both markers. (b) Representative section of the heart of *CD41:GFP* fish (green, thrombocyte reporter line) at 1 dpci labeled with L-Plastin (red) display no overlap between both markers. Cryo-injured area is encircled with the red dashed line. (c) No L-Plastin (red) was detected in luminal blood (asterisk) of the heart at 7 dpt.
